# Supplementary material
Source: PubMed Central journal article supplement (PMC4146499)
Supplement: Supp_Fig1.pdf [file Supp_Fig1.pdf]

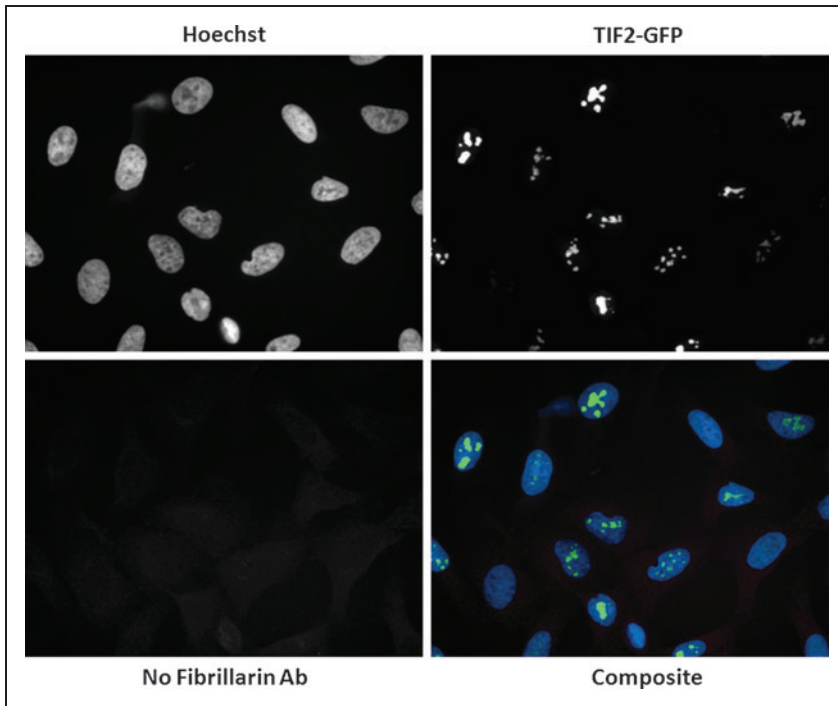

**Supplementary Fig. S1.** Fibrillarin no-antibody control images for the colocalization of transcriptional intermediary factor 2 (TIF2)-green fluorescent protein (GFP) with fibrillarin in nucleoli.  $40\times$  grayscale and color composite images of U-2 OS cells infected with the TIF2-GFP adenovirus alone, which were cultured overnight and then fixed and stained with Hoechst were sequentially acquired on the ImageXpress Micro platform in three fluorescent channels: Ch1 Hoechst, *blue*; Ch2 TIF2-GFP, *green*; and Ch3 fibrillarin, *red*.
