# Supplementary material
Source: PubMed Central journal article supplement (PMC4146499)
Supplement: Supp_Fig2.pdf [file Supp_Fig2.pdf]

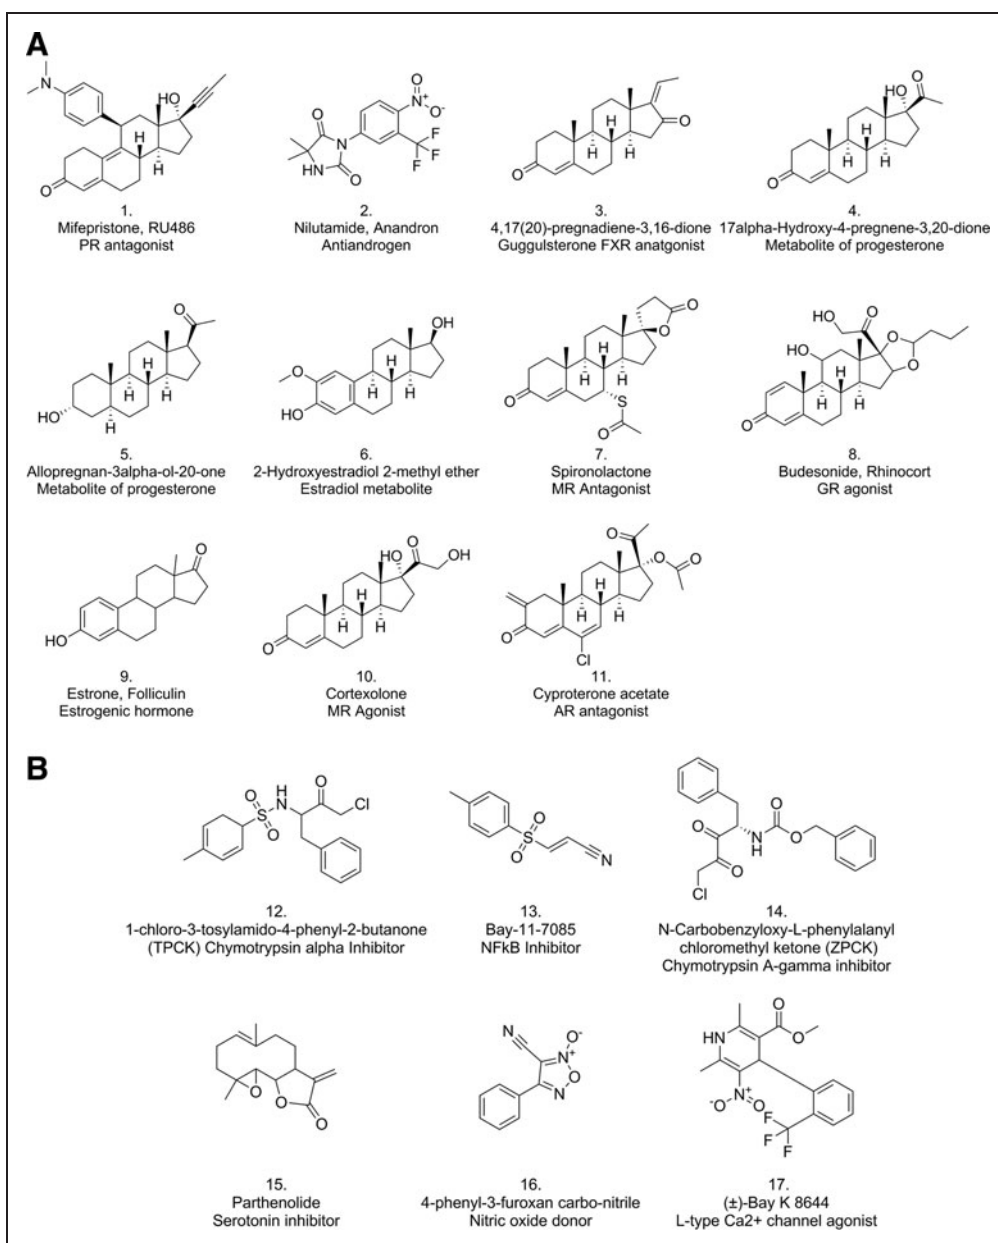

**Supplementary Fig. S2.** Chemical structures and names of Library of Pharmacologically Active Compounds (LOPAC) pilot screen actives. **(A)** Chemical structures and names of nuclear receptor ligands from the LOPAC set that inhibited or disrupted dihydrotestosterone (DHT)-induced androgen receptor (AR)-TIF2 protein-protein interaction (PPI) complexes. The chemical structures and names of steroid family nuclear hormone receptor (NR) modulators in the LOPAC set that produced a mean percent inhibition of DHT-induced AR-TIF2 PPI formation  $\geq 50\%$  or a mean percent disruption of preexisting AR-TIF2 PPIs  $\geq 30\%$  are presented. **(B)** Chemical structures and names of nonnuclear receptor ligands in the LOPAC set that inhibited or disrupted DHT-induced AR-TIF2 PPI complexes. The chemical structures and names of non-NR ligands in the LOPAC set that produced a mean percent inhibition of DHT-induced AR-TIF2 PPI formation  $\geq 50\%$  or a mean percent disruption of preexisting AR-TIF2 PPIs  $\geq 30\%$  are presented.
