# Supplementary material
Source: PubMed Central journal article supplement (PMC4146499)
Supplement: Supp_Fig4.pdf [file Supp_Fig4.pdf]

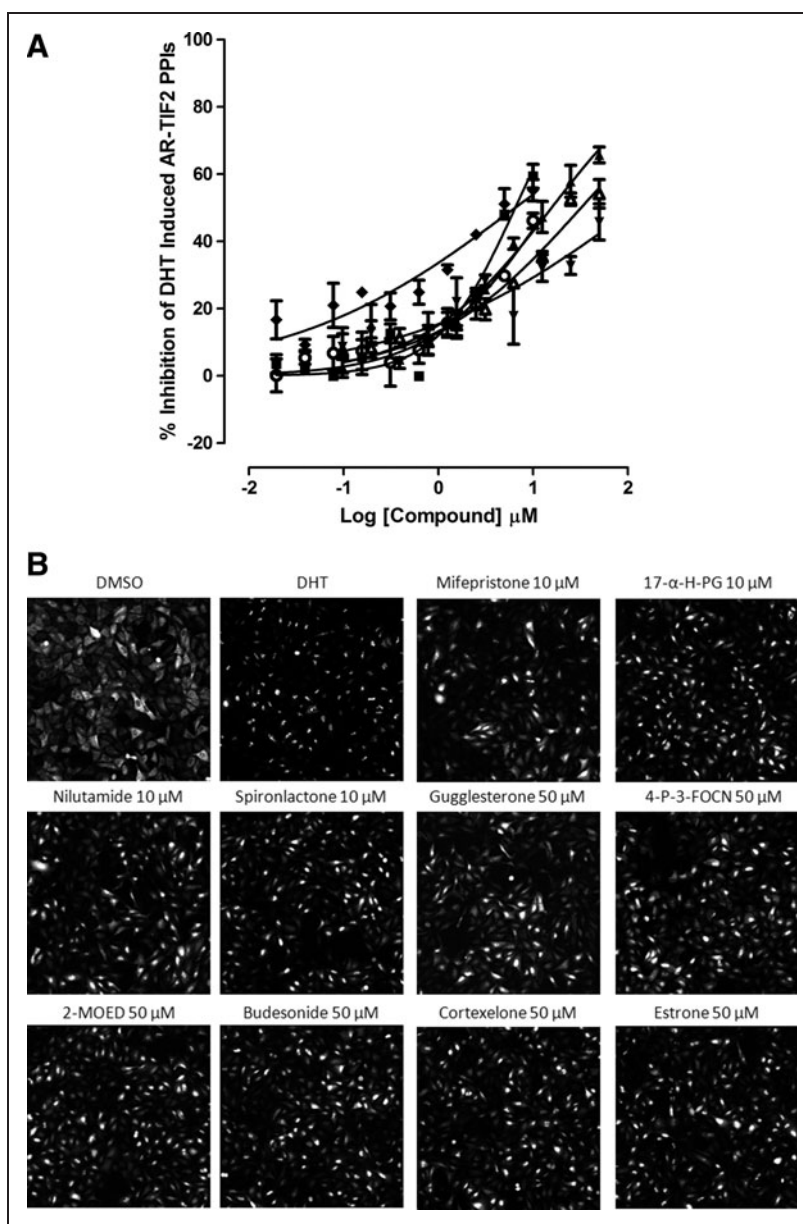

**Supplementary Fig. S4.** Concentration-dependent confirmation of disruptor actives identified in the AR-TIF2 protein–protein interaction biosensor (PPIB) LOPAC screens. **(A)** Concentration-dependent disruption of preexisting DHT-induced AR-TIF2 PPI complexes—compounds with incomplete curves. U-2 OS cells were coinfecting with the AR-RFP and TIF2-GFP rAV biosensors, 2,500 cells were seeded into the wells of 384-well assay plates, cultured overnight at 37°C, 5% CO<sub>2</sub>, and 95% humidity, and then exposed to 20 nM DHT for 30 min. Cells were then treated with compounds at the indicated concentrations for 3 h, fixed and stained with Hoechst, 20× images in three fluorescent channels were acquired on the IXU automated imaging platform, and the AR-TIF2 PPIs were quantified using the TE image analysis module as described previously. The mean ± SD ( $n=3$ ) percent disruption of preformed AR-TIF2 PPI complexes in cells exposed to the indicated concentrations of 17- $\alpha$ -H-PG (○), nilutamide (▼), spironlactone (◆), budesonide (▲), cortexelone (Δ), or estrone (▽) are presented. Representative experimental data from one of the three independent experiments are shown. **(B)** Images of AR-RFP phenotypes in cells exposed to compounds that disrupt preexisting DHT-induced AR-TIF2 PPI complexes. U-2 OS cells were coinfecting with the AR-RFP and TIF2-GFP rAV biosensors, 2,500 cells were seeded into the wells of 384-well assay plates, cultured overnight at 37°C, 5% CO<sub>2</sub>, and 95% humidity, and then exposed to 20 nM DHT for 30 min. Cells were then treated with compounds for 3 h, fixed and stained with Hoechst, 20× images in three fluorescent channels were acquired on the IXU automated imaging platform. Grayscale images of the AR-RFP distribution phenotype of DHT treated cells exposed to 10  $\mu$ M mifepristone, 10  $\mu$ M 17- $\alpha$ -H-PG, 10  $\mu$ M nilutamide, 10  $\mu$ M spironlactone, 50  $\mu$ M guggulesterone, 10  $\mu$ M cyproterone, 50  $\mu$ M 2-MOED, 50  $\mu$ M budesonide, 50  $\mu$ M cortexelone, or 50  $\mu$ M estrone are presented. Grayscale images of the AR-RFP distribution phenotype of the 0.5% DMSO and 20 nM DHT controls are also presented. Representative images from one of the three independent experiments are shown.
