# Supplementary material
Source: PubMed Central journal article supplement (PMC4146499)
Supplement: Supp_Table1.pdf [file Supp_Table1.pdf]

## SUPPLEMENTARY DATA

| Supplementary Table S1. Three-Day Assay Signal Window and Z-Factor Coefficient Determination |             |            |         |       |       |       |       |          |           |
|----------------------------------------------------------------------------------------------|-------------|------------|---------|-------|-------|-------|-------|----------|-----------|
| Class                                                                                        | Day         | Plate      | Max/Min | Mean  | SD    | CV    | PL-PL | Z-Factor | S:B ratio |
| Intraplate                                                                                   | 1           | 1          | Max     | 4,578 | 292   | 6.4   | 1-3   | 0.75     | 7.7       |
|                                                                                              |             | 2          | Max     | 4,478 | 285   | 6.4   | 1-4   | 0.75     | 7.7       |
|                                                                                              |             | 3          | Min     | 592   | 41    | 6.9   | 2-3   | 0.75     | 7.6       |
|                                                                                              |             | 4          | Min     | 593   | 42    | 7.2   | 2-4   | 0.75     | 7.6       |
|                                                                                              |             | All plates |         |       |       |       | All   | 0.74     | 7.6       |
|                                                                                              | 2           | 1          | Max     | 3,963 | 277   | 7.0   | 1-3   | 0.71     | 6.8       |
|                                                                                              |             | 2          | Max     | 4,073 | 272   | 7.0   | 1-4   | 0.71     | 6.9       |
|                                                                                              |             | 3          | Min     | 581   | 48    | 8.3   | 2-3   | 0.72     | 7.0       |
|                                                                                              |             | 4          | Min     | 576   | 47    | 8.2   | 2-4   | 0.73     | 7.1       |
|                                                                                              |             | All plates |         |       |       |       | All   | 0.71     | 7.0       |
|                                                                                              | 3           | 1          | Max     | 1,945 | 125   | 6.4   | 1-3   | 0.74     | 6.8       |
|                                                                                              |             | 2          | Max     | 1,981 | 163   | 8.2   | 1-4   | 0.74     | 6.6       |
|                                                                                              |             | 3          | Min     | 288   | 21    | 7.2   | 2-3   | 0.67     | 6.9       |
|                                                                                              |             | 4          | Min     | 293   | 20    | 7.0   | 2-4   | 0.67     | 6.8       |
|                                                                                              |             | All plates |         |       |       |       | All   | 0.7      | 6.8       |
| Interplate                                                                                   | 1           | 1 and 2    | Max     | 4,528 | 293   | 6.5   |       | 0.74     | 7.6       |
|                                                                                              |             | 3 and 4    | Min     | 592   | 42    | 7.0   |       |          |           |
|                                                                                              | 2           | 1 and 2    | Max     | 4,018 | 278   | 7.0   |       | 0.71     | 7.0       |
|                                                                                              |             | 3 and 4    | Min     | 578   | 48    | 8.3   |       |          |           |
|                                                                                              | 3           | 1 and 2    | Max     | 1,963 | 146   | 7.5   |       | 0.70     | 6.8       |
|                                                                                              |             | 3 and 4    | Min     | 290   | 21    | 7.1   |       |          |           |
| Day to Day                                                                                   | Day 1 and 2 | All plates | Max     | 4,273 | 383   | 9.0   |       | 0.65     | 7.30      |
|                                                                                              |             |            | Min     | 585   | 45    | 7.8   |       |          |           |
|                                                                                              | Day 2 and 3 | All plates | Max     | 2,990 | 1,052 | 35.2  |       | -0.41    | 6.89      |
|                                                                                              |             |            | Min     | 434   | 149   | 34.23 |       |          |           |

The average inner intensity of AR-RFP (Ch3) within the TIF2-GFP-positive nucleoli (Ch2) data presented in *Table 2* was generated in three independent experiments of 2×384-well plates each of the maximum (20 nM DHT and 0.2% DMSO) and minimum (0.2% DMSO) plate controls conducted on 3 separate days.

AR, androgen receptor; CV, coefficient of variation; DHT, dihydrotestosterone; DMSO, dimethyl sulfoxide; GFP, green fluorescent protein; PL-PL, plate to plate comparison; RFP, red fluorescent protein; S:B, signal-to-background; SD, standard deviation; TIF2, transcriptional intermediary factor 2.
