# Supplementary material
Source: PubMed Central journal article supplement (PMC4146499)
Supplement: Supp_Table2.pdf [file Supp_Table2.pdf]

**Supplementary Table S2. Three-Day Five-Plate DMSO Validation**

| Day | Plate | Max <sup>a</sup> controls All <sup>b</sup> AR-RFP in nucleoli |     |      | Min <sup>c</sup> controls All <sup>b</sup> AR-RFP in nucleoli |    |      | Plate performance statistics |           |
|-----|-------|---------------------------------------------------------------|-----|------|---------------------------------------------------------------|----|------|------------------------------|-----------|
|     |       | Mean ( <i>n</i> =32)                                          | SD  | CV   | Mean ( <i>n</i> =32)                                          | SD | CV   | Z'-factor                    | S:B ratio |
| 1   | 1     | 4,988                                                         | 480 | 9.6  | 459                                                           | 44 | 9.7  | 0.65                         | 10.9      |
|     | 2     | 4,883                                                         | 340 | 7.0  | 456                                                           | 54 | 11.7 | 0.73                         | 10.7      |
|     | 3     | 4,373                                                         | 311 | 7.1  | 419                                                           | 35 | 8.4  | 0.74                         | 10.4      |
|     | 4     | 4,646                                                         | 378 | 8.1  | 436                                                           | 52 | 12.0 | 0.69                         | 10.7      |
|     | 5     | 4,539                                                         | 307 | 6.8  | 409                                                           | 34 | 8.3  | 0.75                         | 11.1      |
| 2   | 1     | 4,949                                                         | 551 | 11.1 | 537                                                           | 45 | 8.3  | 0.59                         | 9.2       |
|     | 2     | 5,041                                                         | 506 | 10.0 | 522                                                           | 37 | 7.2  | 0.64                         | 9.7       |
|     | 3     | 4,874                                                         | 390 | 8.0  | 539                                                           | 55 | 10.2 | 0.69                         | 9.0       |
|     | 4     | 4,857                                                         | 403 | 8.3  | 526                                                           | 46 | 8.8  | 0.69                         | 9.2       |
|     | 5     | 4,940                                                         | 471 | 9.5  | 508                                                           | 29 | 5.8  | 0.66                         | 9.7       |
| 3   | 1     | 5,476                                                         | 447 | 8.2  | 529                                                           | 40 | 7.5  | 0.71                         | 10.4      |
|     | 2     | 5,133                                                         | 297 | 5.8  | 492                                                           | 33 | 6.6  | 0.79                         | 10.4      |
|     | 3     | 4,990                                                         | 292 | 5.9  | 477                                                           | 34 | 7.2  | 0.78                         | 10.5      |
|     | 4     | 5,009                                                         | 357 | 7.1  | 481                                                           | 35 | 7.2  | 0.74                         | 10.4      |
|     | 5     | 2,910                                                         | 196 | 6.7  | 281                                                           | 20 | 7.0  | 0.75                         | 10.4      |

The average inner intensity of AR-RFP (Ch3) within TIF2-GFP-positive nucleoli (Ch2) data presented was generated in three independent experiments of 5×384-well DMSO validation plates. These experiments were designed to mimic 3 days of automated screening operations in the AR-TIF2 PPIB HCS assay, save that DMSO was added to wells instead of compounds. The average inner intensity of AR-RFP Ch3 data of the maximum and minimum plate controls from each of the 15×384-well plates are presented.

<sup>a</sup>Max, maximum plate controls (20 nM DHT and 0.2% DMSO, *n*=32).

<sup>b</sup>All, average inner intensity AR-RFP within TIF2-GFP-positive nucleoli.

<sup>c</sup>Min, minimum plate controls (0.2% DMSO, *n*=32).

PPIB, protein-protein interaction biosensor.
